# Supplementary material
Source: Research Square preprint supplement (doi:10.21203/rs.3.rs-9192459/v1)
Supplement: Supplementary file 1 [file 6b0b81256bf88ccaf5c1a8cb.pdf]

## ***Supplementary Information for***

# **Accelerating renewable deployment under rapid growth of electricity demand**

Xizhe Yan<sup>1</sup>, Dan Tong<sup>1\*</sup>, Xin Xin<sup>1</sup>, Steven J. Davis<sup>2</sup>, Joeri Rogelj<sup>3</sup>, Jing Cheng<sup>4</sup>, Dabo Guan<sup>1,5</sup>, Kebin He<sup>6,7</sup>, Qiang Zhang<sup>1,7</sup>

<sup>1</sup>Department of Earth System Science, Ministry of Education Key Laboratory for Earth System Modeling, Institute for Global Change Studies, Tsinghua University, Beijing 100084, People's Republic of China

<sup>2</sup>Department of Earth System Science, Stanford Doerr School of Sustainability, Stanford University, Stanford, California 94305, United States

<sup>3</sup>Centre for Environmental Policy and Grantham Institute – Climate Change and Environment, Imperial College London, London SW72AZ, United Kingdom

<sup>4</sup>College of Environmental Sciences and Engineering, Peking University, Beijing 100871, China

<sup>5</sup>The Bartlett School of Sustainable Construction, University College London, London WC1E7BT, United Kingdom

<sup>6</sup>State Key Joint Laboratory of Environment Simulation and Pollution Control, School of Environment, Tsinghua University, Beijing 100084, People's Republic of China

<sup>7</sup>Institute for Carbon Neutrality, Tsinghua University, Beijing, 100084, People's Republic of China

\*corresponding authors: [dantong@tsinghua.edu.cn](mailto:dantong@tsinghua.edu.cn)

## **Table of Content**

|                                |    |
|--------------------------------|----|
| Supplementary Texts .....      | 1  |
| Supplementary Figures .....    | 4  |
| Supplementary Tables .....     | 9  |
| Supplementary References ..... | 21 |

## Supplementary Texts

### Supplementary Text 1 | Sensitivity tests

To illustrate the potential impacts of key factors and assess uncertainties arising from our modelling framework, we conducted a series of sensitivity tests by varying fuel shares within fossil generation, nuclear generation trajectories, rates of fossil emission reductions, changes in fossil power capacity factors, and regional allocation of future electricity demand. Assumptions of the base case and sensitivity tests are listed in Supplementary Table 2 and described below.

***Fuel shares within fossil generation.*** To examine the robustness of our results to alternative assumptions about fossil generation composition, we conducted sensitivity tests by adjusting the penetration rates of different fossil fuels. Instead of adopting the median values across the AR6 1.5°C+2°C scenario ensemble as in the base case, we derived fuel shares within fossil generation from individual IAM scenarios in each category of C1–C4, including EN\_NPi2020\_450f (WITCH 5.0), R2p1\_SSP1-PkBudg1300 (REMIND 2.1), SSP2\_SPA2\_26I\_D (IMAGE 3.2), and NGFS2\_Delayed Transition (GCAM 5.3), and used these as inputs to the stock turnover model. Across all tests, fossil decarbonization trajectories remain notably consistent, indicating that these tests do not substantially alter our main conclusions.

***Nuclear generation trajectories.*** To evaluate the influence of nuclear expansion on fossil transition dynamics, we performed sensitivity tests by varying nuclear generation trajectories while keeping other assumptions unchanged. In the base case, nuclear generation follows the median trajectory across the AR6 1.5°C+2°C scenario ensemble. In the sensitivity tests, we instead adopted the 25<sup>th</sup> and 75<sup>th</sup> percentile trajectories of nuclear generation across the same ensemble, as well as a constant nuclear generation pathway, to explore lower-bound, upper-bound, and no-expansion cases. The results show that nuclear expansion exerts a pronounced influence on fossil decarbonization under weaker mitigation assumptions. Taking demand–renewables trajectories implied by the WEO 2025 Stated Policies Scenario as an example, the reduction in fossil capacity is 1.3 times as large as in the base case when nuclear generation follows the 75<sup>th</sup> percentile trajectory across the AR6 1.5°C+2°C scenario ensemble. This finding suggests that advances in nuclear technology may substantially facilitate deeper decarbonization of the power sector.

***Emission reductions in fossil power generation.*** To assess the implications of alternative carbon management trajectories, we conducted sensitivity tests by varying emission constraints consistent with the WEO Net Zero Emissions by 2050 Scenario and Stated Policies Scenario. Specifically, we adjusted the implied global fossil power emission reduction rates to align with

each scenario. Our results indicate that stronger emission constraints, as reflected in the Net Zero Emissions by 2050 Scenario, substantially increase the required scale of CCUS deployment. However, even under the fossil emission reduction rates implied by the Stated Policies Scenario, maintaining recent growth in electricity demand and renewable generation would still necessitate the deployment of more than 200 Gt of CCUS to keep fossil emissions on track. These results underscore that accelerating the share of new electricity demand met by renewables is critical to limiting long-term reliance on large-scale CCUS deployment.

***Changes in fossil power capacity factors.*** To examine the influence of alternative fossil power capacity factors (CF), we conducted sensitivity tests by varying CF assumptions. In the base case, CF trajectories are derived from the median values of fuel-specific fossil generation and capacity across the AR6 1.5°C+2°C scenario ensemble. In the sensitivity analysis, we instead adopted CF trajectories implied by individual IAM scenarios, selecting the following scenarios: EN\_NPi2020\_450f (WITCH 5.0), R2p1\_SSP1-PkBudg1300 (REMIND 2.1), SSP2\_SPA2\_26I\_D (IMAGE 3.2), and NGFS2\_Delayed Transition (GCAM 5.3). Across all tests, CF assumptions exert a noticeable influence on fossil capacity expansion and cumulative emissions under scenarios with relatively weaker renewable growth (e.g., Stated Policies Scenario), whereas their influence is comparatively limited under stronger decarbonization pathways. This sensitivity arises from substantial variation in CF trajectories across IAM-based scenarios. For example, the NGFS2\_Delayed Transition (GCAM 5.3) scenario projects an upward trend in coal CF, whereas SSP2\_SPA2\_26I\_D (IMAGE 3.2) scenario projects a decline of 0.7%/yr during 2020–2050. Such differences translate into different installed capacity requirements for a given level of fossil generation and shift the turnover of plant retirement and new construction.

***Regional allocation of future electricity demand.*** To assess how uncertainty in regional electricity demand trajectories affects fossil decarbonization, we conducted sensitivity tests by the varying regional allocation of future electricity demand. In the base case, regional allocation of future electricity demand is derived from the median values across the AR6 1.5°C+2°C scenario ensemble. In the sensitivity analysis, we instead adopted regional demand distributions from individual IAM scenarios, including EN\_NPi2020\_450f (WITCH 5.0), R2p1\_SSP1-PkBudg1300 (REMIND 2.1), SSP2\_SPA2\_26I\_D (IMAGE 3.2), and NGFS2\_Delayed Transition (GCAM 5.3). Across all tests, fossil decarbonization trajectories remain broadly comparable to the base case. This consistency reflects the robust projection across models of a growing contribution from developing regions to global electricity demand growth.

## Supplementary Text 2 | Future projections of electricity demand in hydrogen production

Regarding the electricity demand for hydrogen production, we extract hydrogen output from two production technologies (water electrolysis and fossil fuels with CCUS, Supplementary Table 8). Based on the power consumption per unit of hydrogen output, we calculate the electricity demand of the hydrogen production for different technologies. The above processes were conducted at IEA-projection in Low-emissions Hydrogen Balance table of WEO 2025<sup>1</sup>, AR6 1.5°C+2°C scenario ensemble, and historical production from the IEA Global Hydrogen Review 2025<sup>2</sup>.

## Supplementary Text 3 | Installed capacity of non-fossil technologies

For non-fossil technologies, capacity additions are derived from required generation and technology-specific capacity factors, then converted into incremental capacity by tracking year-to-year increases in required installed capacity.

Specifically, the required installed capacity for each technology is inferred from annual electricity generation and technology-specific capacity factors as:

$$Cap_{t,r,y,sens} = \frac{Generation_{t,r,y,sens}}{(CF_{t,r,y}/100) \times 8760} \times 1000 \quad (S1)$$

where  $Cap_{t,r,y,sens}$  denotes the installed capacity (kW) of technology  $t$  in region  $r$  and year  $y$  under a given sensitivity test.  $Generation_{t,r,y}$  represents the annual generation (MWh) and  $CF_{t,r,y}$  is the capacity factor (%). Technology- and region-specific capacity factors are taken from the AR6 median projections, consistent with the assumptions described in the Methods.

## Supplementary Figures

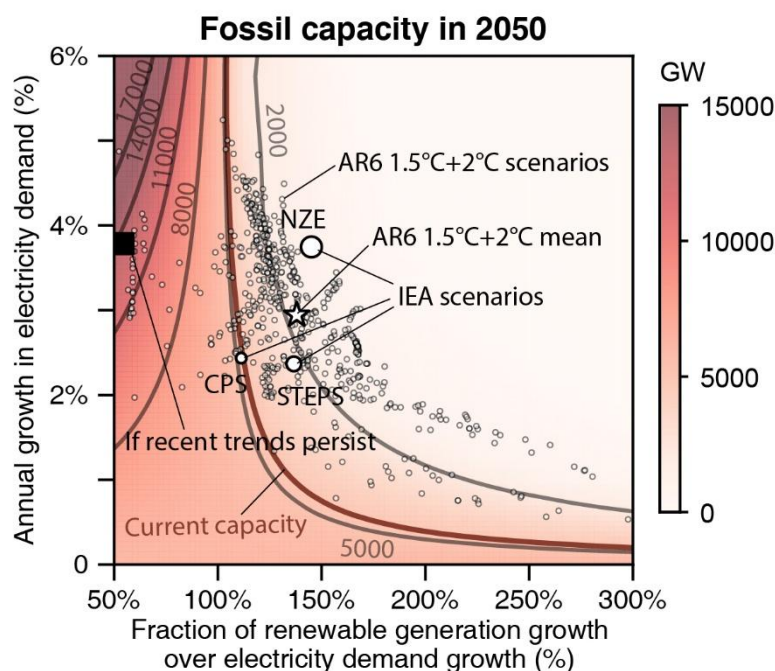

**Supplementary Figure 1 | How electricity demand growth and fraction of renewable generation growth over electricity demand growth shape total installed capacity of fossil power in 2050.** Circles denote the WEO-projected electricity demand and renewable growth of the Current Policies Scenario (CPS), the Stated Policies Scenario (STEPS) and the Net Zero Emissions by 2050 Scenario (NZE) over 2024–2050. Squares denote the recent demand and renewable growth during 2020–2024, assuming recent trends persist. Star and points represent the ensemble mean and individual projections of electricity demand and renewable growth across the AR6 1.5°C+2°C mitigation scenarios over 2024–2050, respectively. Red line represents current fossil capacity in 2024.

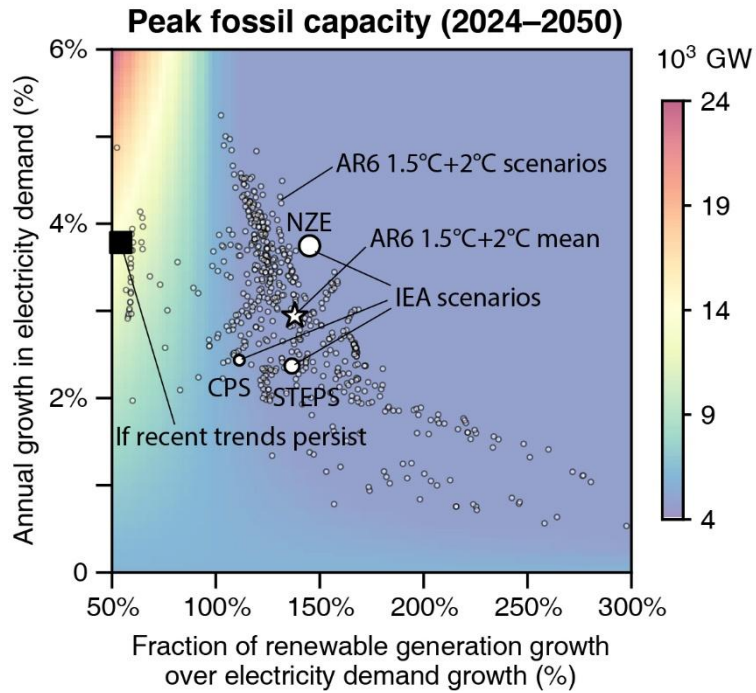

**Supplementary Figure 2 | How electricity demand growth and fraction of renewable generation growth over electricity demand growth shape global maximum fossil capacity over 2024–2050.** Circles denote the WEO-projected electricity demand and renewable growth of the Current Policies Scenario (CPS), the Stated Policies Scenario (STEPS) and the Net Zero Emissions by 2050 Scenario (NZE) over 2024–2050. Squares denote the recent demand and renewable growth during 2020–2024, assuming recent trends persist. Star and points represent the ensemble mean and individual projections of electricity demand and renewable growth across the AR6 1.5°C+2°C mitigation scenarios over 2024–2050, respectively.

### The timing of global renewable energy capacity tripling

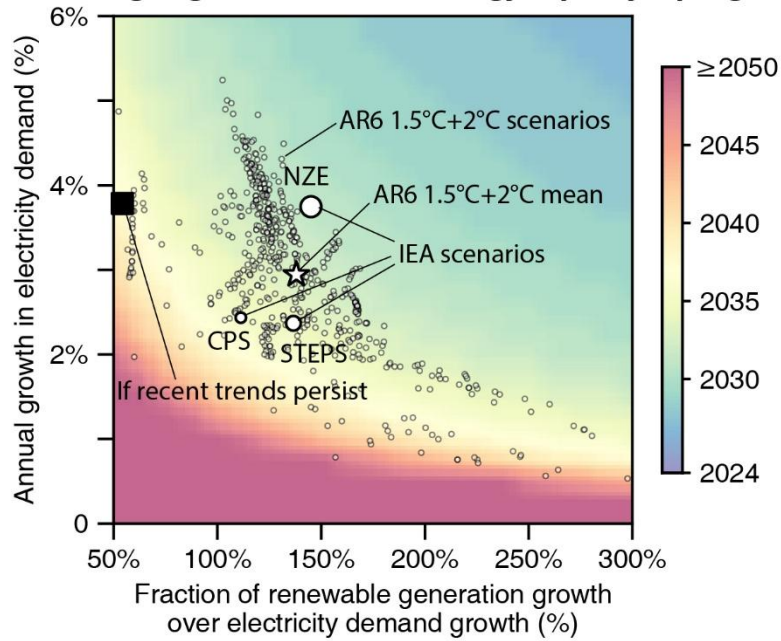

**Supplementary Figure 3 | How electricity demand growth and fraction of renewable generation growth over electricity demand growth shape the timing of global renewable energy capacity tripling.** Circles denote the WEO-projected electricity demand and renewable growth of the Current Policies Scenario (CPS), the Stated Policies Scenario (STEPS) and the Net Zero Emissions by 2050 Scenario (NZE) over 2024–2050. Squares denote the recent demand and renewable growth during 2020–2024, assuming recent trends persist. Star and points represent the ensemble mean and individual projections of electricity demand and renewable growth across the AR6 1.5°C+2°C mitigation scenarios over 2024–2050, respectively.

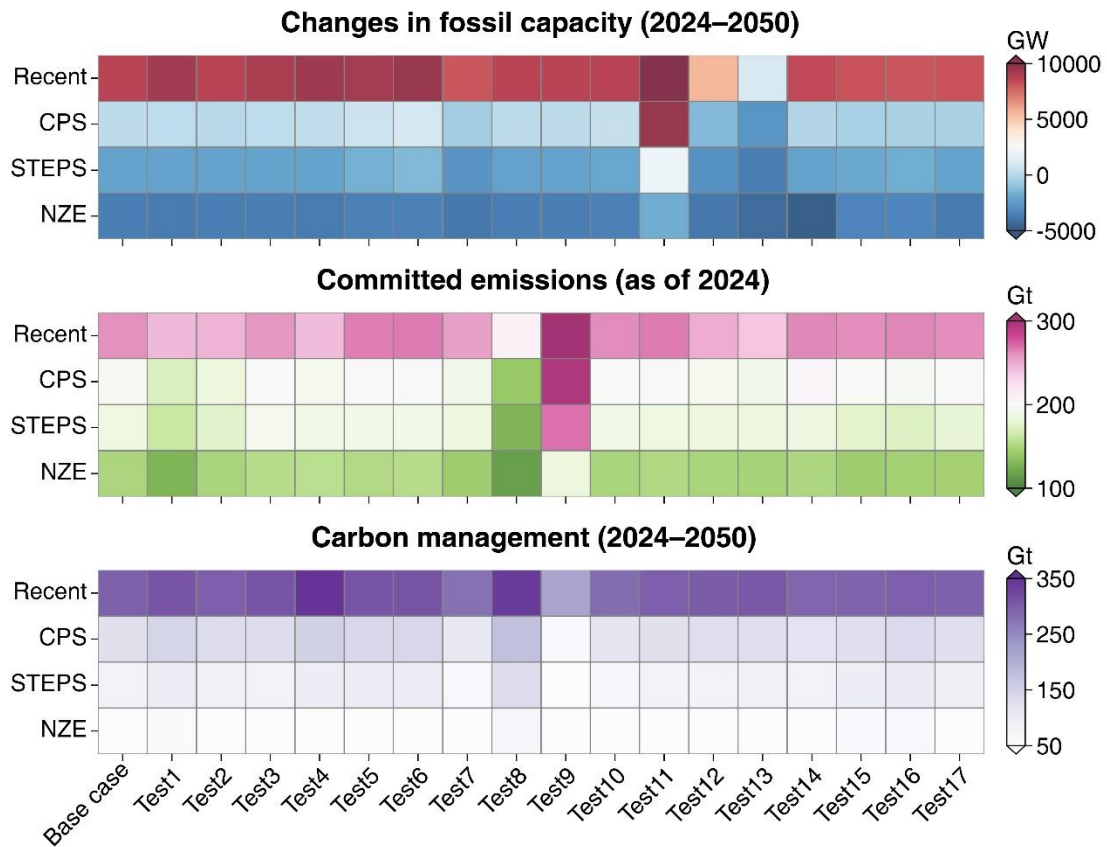

**Supplementary Figure 4 | Comparison of fossil decarbonization outcomes among the base case and sensitivity tests.** The heatmaps show changes in total capacity by 2050 (a), committed emissions as of 2024 (b) and total CCUS deployment by 2050 (c) across demand–renewables trajectories defined by recent growth rates (2020–2024), assuming recent trends persist, and those projected for 2024–2050 under the Current Policies Scenario (CPS), the Stated Policies Scenario (STEPS), and the Net Zero Emissions by 2050 Scenario (NZE). Descriptions of sensitivity tests are summarized in Supplementary Table 2.

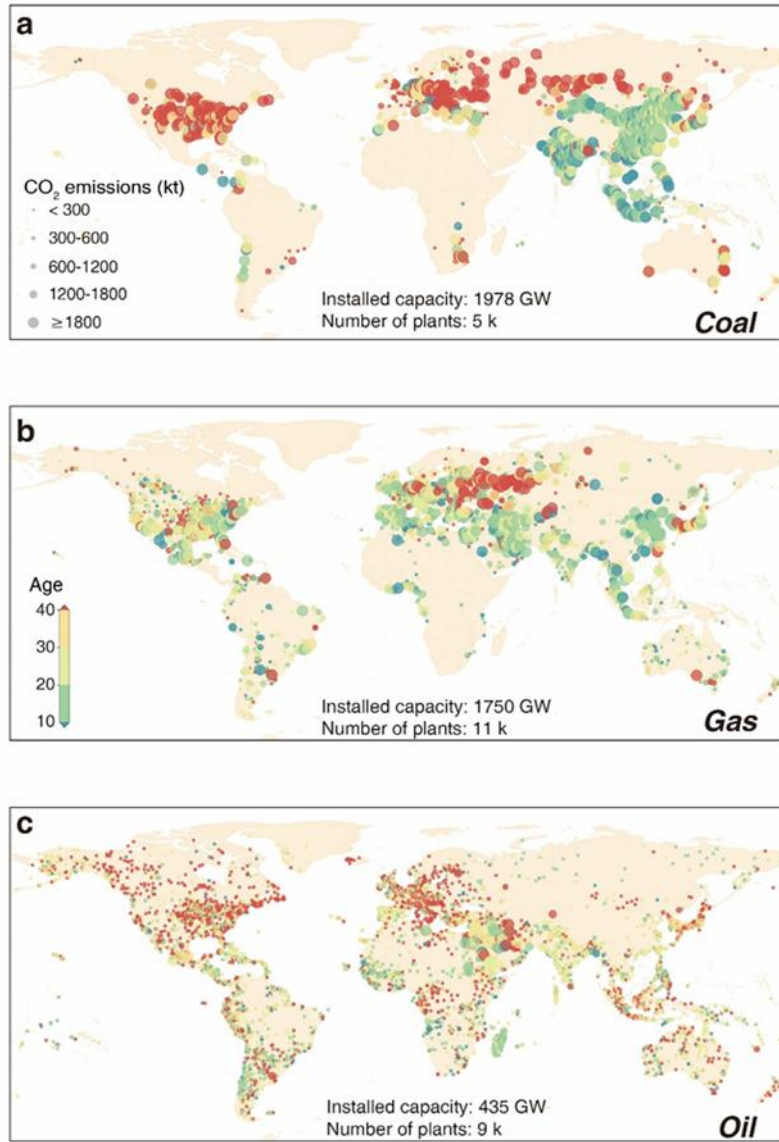

**Supplementary Figure 5 | Global fossil-fuel power plants by fuel type in 2024.** Data for coal (a), gas (b), and oil (c) power plants compiled from the Global Infrastructure Emissions Detector (GID) database. Each point represents an individual power plant, with point size and color indicating plant-level CO<sub>2</sub> emissions and age, respectively.

## Supplementary Tables

**Supplementary Table 1 | Country and region mapping correspondence between IEA energy balance, GID database, and AR6 Region5 classifications\*.**

| IEA country                           | GID country                          | AR6 Region5      |
|---------------------------------------|--------------------------------------|------------------|
| Albania                               | Albania                              | OECD+EU          |
| Algeria                               | Algeria                              | Mideast+Africa   |
| Angola                                | Angola                               | Mideast+Africa   |
| Argentina                             | Argentina                            | Latin America    |
| Armenia                               | Armenia                              | E. Europe+Russia |
| Australia                             | Australia                            | OECD+EU          |
| Austria                               | Austria                              | OECD+EU          |
| Azerbaijan                            | Azerbaijan                           | E. Europe+Russia |
| Bahrain                               | Bahrain                              | Mideast+Africa   |
| Bangladesh                            | Bangladesh                           | Asia             |
| Belarus                               | Belarus                              | E. Europe+Russia |
| Belgium                               | Belgium                              | OECD+EU          |
| Benin                                 | Benin                                | Mideast+Africa   |
| Plurinational State of Bolivia        | Bolivia                              | Latin America    |
| Bosnia and Herzegovina                | Bosnia and Herzegovina               | OECD+EU          |
| Botswana                              | Botswana                             | Mideast+Africa   |
| Brazil                                | Brazil                               | Latin America    |
| Brunei Darussalam                     | Brunei Darussalam                    | Asia             |
| Bulgaria                              | Bulgaria                             | OECD+EU          |
| Cambodia                              | Cambodia                             | Asia             |
| Cameroon                              | Cameroon                             | Mideast+Africa   |
| Canada                                | Canada                               | OECD+EU          |
| Chile                                 | Chile                                | Latin America    |
| People's Republic of China            | China                                | Asia             |
| Colombia                              | Colombia                             | Latin America    |
| Republic of the Congo                 | Congo                                | Mideast+Africa   |
| Costa Rica                            | Costa Rica                           | Latin America    |
| Côte d'Ivoire                         | Cote d'Ivoire                        | Mideast+Africa   |
| Croatia                               | Croatia                              | OECD+EU          |
| Cuba                                  | Cuba                                 | Latin America    |
| Cyprus                                | Cyprus                               | OECD+EU          |
| Czech Republic                        | Czech Republic                       | OECD+EU          |
| Democratic People's Republic of Korea | Democratic Peoples Republic of Korea | Asia             |
| Democratic Republic of the Congo      | Democratic Republic of Congo         | Mideast+Africa   |
| Denmark                               | Denmark                              | OECD+EU          |

---

|                                     |                          |                  |
|-------------------------------------|--------------------------|------------------|
| Dominican Republic                  | Dominican Republic       | Latin America    |
| Ecuador                             | Ecuador                  | Latin America    |
| Egypt                               | Egypt                    | Mideast+Africa   |
| El Salvador                         | El Salvador              | Latin America    |
| Equatorial Guinea                   | Equatorial Guinea        | Mideast+Africa   |
| Eritrea                             | Eritrea                  | Mideast+Africa   |
| Estonia                             | Estonia                  | OECD+EU          |
| Kingdom of Eswatini                 | Swaziland                | Mideast+Africa   |
| Ethiopia                            | Ethiopia                 | Mideast+Africa   |
| Finland                             | Finland                  | OECD+EU          |
| France                              | France                   | OECD+EU          |
| Gabon                               | Gabon                    | Mideast+Africa   |
| Georgia                             | Georgia                  | E. Europe+Russia |
| Germany                             | Germany                  | OECD+EU          |
| Ghana                               | Ghana                    | Mideast+Africa   |
| Greece                              | Greece                   | OECD+EU          |
| Guatemala                           | Guatemala                | Latin America    |
| Guyana                              | Guyana                   | Latin America    |
| Haiti                               | Haiti                    | Latin America    |
| Honduras                            | Honduras                 | Latin America    |
| Hong Kong, China                    | Hong Kong, China         | Asia             |
| Hungary                             | Hungary                  | OECD+EU          |
| Iceland                             | Iceland                  | OECD+EU          |
| India                               | India                    | Asia             |
| Indonesia                           | Indonesia                | Asia             |
| Islamic Republic of Iran            | Islamic Republic of Iran | Mideast+Africa   |
| Iraq                                | Iraq                     | Mideast+Africa   |
| Ireland                             | Ireland                  | OECD+EU          |
| Israel                              | Israel                   | Mideast+Africa   |
| Italy                               | Italy                    | OECD+EU          |
| Jamaica                             | Jamaica                  | Latin America    |
| Japan                               | Japan                    | OECD+EU          |
| Jordan                              | Jordan                   | Mideast+Africa   |
| Kazakhstan                          | Kazakhstan               | E. Europe+Russia |
| Kenya                               | Kenya                    | Mideast+Africa   |
| Korea                               | Republic of Korea        | Asia             |
| Kuwait                              | Kuwait                   | Mideast+Africa   |
| Kyrgyzstan                          | Kyrgyzstan               | E. Europe+Russia |
| Latvia                              | Latvia                   | OECD+EU          |
| Lao People's Democratic<br>Republic | Laos                     | Asia             |
| Lebanon                             | Lebanon                  | Mideast+Africa   |

---

---

|                             |                                                      |                  |
|-----------------------------|------------------------------------------------------|------------------|
| Libya                       | Libya                                                | Mideast+Africa   |
| Lithuania                   | Lithuania                                            | OECD+EU          |
| Luxembourg                  | Luxembourg                                           | OECD+EU          |
| Madagascar                  | Madagascar                                           | Mideast+Africa   |
| Malaysia                    | Malaysia                                             | Asia             |
| Malta                       | Malta                                                | OECD+EU          |
| Mauritius                   | Mauritius                                            | Mideast+Africa   |
| Mexico                      | Mexico                                               | Latin America    |
| Republic of Moldova         | Moldova                                              | E. Europe+Russia |
| Mongolia                    | Mongolia                                             | Asia             |
| Montenegro                  | Montenegro                                           | OECD+EU          |
| Morocco                     | Morocco                                              | Mideast+Africa   |
| Mozambique                  | Mozambique                                           | Mideast+Africa   |
| Myanmar                     | Myanmar (Burma)                                      | Asia             |
| Namibia                     | Namibia                                              | Mideast+Africa   |
| Nepal                       | Nepal                                                | Asia             |
| Netherlands                 | Netherlands                                          | OECD+EU          |
| New Zealand                 | New Zealand                                          | OECD+EU          |
| Nicaragua                   | Nicaragua                                            | Latin America    |
| Niger                       | Niger                                                | Mideast+Africa   |
| Nigeria                     | Nigeria                                              | Mideast+Africa   |
| Republic of North Macedonia | Macedonia (former Yugoslav<br>Republic of Macedonia) | OECD+EU          |
| Norway                      | Norway                                               | OECD+EU          |
| Oman                        | Oman                                                 | Mideast+Africa   |
| Pakistan                    | Pakistan                                             | Asia             |
| Panama                      | Panama                                               | Latin America    |
| Paraguay                    | Paraguay                                             | Latin America    |
| Peru                        | Peru                                                 | Latin America    |
| Philippines                 | Philippines                                          | Asia             |
| Poland                      | Poland                                               | OECD+EU          |
| Portugal                    | Portugal                                             | OECD+EU          |
| Qatar                       | Qatar                                                | Mideast+Africa   |
| Romania                     | Romania                                              | OECD+EU          |
| Russian Federation          | Russia                                               | E. Europe+Russia |
| Rwanda                      | Rwanda                                               | Mideast+Africa   |
| Saudi Arabia                | Saudi Arabia                                         | Mideast+Africa   |
| Senegal                     | Senegal                                              | Mideast+Africa   |
| Serbia                      | Serbia                                               | OECD+EU          |
| Singapore                   | Singapore                                            | Asia             |
| Slovak Republic             | Slovakia                                             | OECD+EU          |
| Slovenia                    | Slovenia                                             | OECD+EU          |

---

---

|                                     |                      |                  |
|-------------------------------------|----------------------|------------------|
| South Africa                        | South Africa         | Mideast+Africa   |
| South Sudan                         | South Sudan          | Mideast+Africa   |
| Spain                               | Spain                | OECD+EU          |
| Sri Lanka                           | Sri Lanka            | Asia             |
| Sudan                               | Sudan                | Mideast+Africa   |
| Suriname                            | Suriname             | Latin America    |
| Sweden                              | Sweden               | OECD+EU          |
| Switzerland                         | Switzerland          | OECD+EU          |
| Syrian Arab Republic                | Syria                | Mideast+Africa   |
| Taiwan, China                       | Taiwan, China        | Asia             |
| Tajikistan                          | Tajikistan           | E. Europe+Russia |
| United Republic of Tanzania         | Tanzania             | Mideast+Africa   |
| Thailand                            | Thailand             | Asia             |
| Togo                                | Togo                 | Mideast+Africa   |
| Trinidad and Tobago                 | Trinidad and Tobago  | Latin America    |
| Tunisia                             | Tunisia              | Mideast+Africa   |
| Republic of Türkiye                 | Turkey               | OECD+EU          |
| Turkmenistan                        | Turkmenistan         | E. Europe+Russia |
| Uganda                              | Uganda               | Mideast+Africa   |
| Ukraine                             | Ukraine              | E. Europe+Russia |
| United Arab Emirates                | United Arab Emirates | Mideast+Africa   |
| United Kingdom                      | United Kingdom       | OECD+EU          |
| United States                       | United States        | OECD+EU          |
| Uruguay                             | Uruguay              | Latin America    |
| Uzbekistan                          | Uzbekistan           | E. Europe+Russia |
| Bolivarian Republic of<br>Venezuela | Venezuela            | Latin America    |
| Viet Nam                            | Vietnam              | Asia             |
| Yemen                               | Yemen                | Mideast+Africa   |
| Zambia                              | Zambia               | Mideast+Africa   |
| Zimbabwe                            | Zimbabwe             | Mideast+Africa   |
| Memo: Greenland                     | Greenland            | OECD+EU          |

---

\*Notably, countries that categorized under the "Rest of the World" in the AR6 Region5 classification are excluded from the regional analysis and sensitivity tests, owing to their negligible power demand and generation volume as well as insufficient scenario data.

**Supplementary Table 2 | Assumptions for sensitivity tests.**

| Key sensitivity                                  | Test name | Assumption                                                              |
|--------------------------------------------------|-----------|-------------------------------------------------------------------------|
| Fuel shares within fossil generation by region   | Base case | Median values of AR6 1.5°C+2°C scenario ensembles                       |
|                                                  | Test1     | Values from the EN_NPi2020_450f scenario of the WITCH 5.0 model         |
|                                                  | Test2     | Values from the R2p1_SSP1-PkBudg1300 scenario of the REMIND 2.1 model   |
|                                                  | Test3     | Values from the SSP2_SPA2_26I_D scenario of the IMAGE 3.2 model         |
|                                                  | Test4     | Values from the NGFS2_Delayed Transition scenario of the GCAM 5.3 model |
| Nuclear generation by region                     | Base case | Median values of AR6 1.5°C+2°C scenario ensembles                       |
|                                                  | Test5     | Fixed at current levels                                                 |
|                                                  | Test6     | 25 <sup>th</sup> percentiles of AR6 1.5°C+2°C scenario ensembles        |
|                                                  | Test7     | 75 <sup>th</sup> percentiles of AR6 1.5°C+2°C scenario ensembles        |
| Emission reductions in fossil power generation   | Base case | Average values of ASP and NZE scenarios from WEO 2024                   |
|                                                  | Test8     | Values of NZE scenario from WEO 2025                                    |
|                                                  | Test9     | Values of STEPS scenario from WEO 2025                                  |
| Changes in fossil power capacity factors         | Base case | Median values of AR6 1.5°C+2°C scenario ensembles                       |
|                                                  | Test10    | Values from the EN_NPi2020_450f scenario of the WITCH 5.0 model         |
|                                                  | Test11    | Values from the R2p1_SSP1-PkBudg1300 scenario of the REMIND 2.1 model   |
|                                                  | Test12    | Values from the SSP2_SPA2_26I_D scenario of the IMAGE 3.2 model         |
|                                                  | Test13    | Values from the NGFS2_Delayed Transition scenario of the GCAM 5.3 model |
| Regional allocation of future electricity demand | Base case | Median values of AR6 1.5°C+2°C scenario ensembles                       |
|                                                  | Test14    | Values from the EN_NPi2020_450f scenario of the WITCH 5.0 model         |
|                                                  | Test15    | Values from the R2p1_SSP1-PkBudg1300 scenario of the REMIND 2.1 model   |
|                                                  | Test16    | Values from the SSP2_SPA2_26I_D scenario of the IMAGE 3.2 model         |
|                                                  | Test17    | Values from the NGFS2_Delayed Transition scenario of the GCAM 5.3 model |

**Supplementary Table 3 | Technology mapping scheme used to aggregate the detailed energy sources of energy balance tables.**

| <b>Technology in this study</b> | <b>Product in WEB</b>                                                                                                                                                                                                                                                                                                                                                                          |
|---------------------------------|------------------------------------------------------------------------------------------------------------------------------------------------------------------------------------------------------------------------------------------------------------------------------------------------------------------------------------------------------------------------------------------------|
| Coal                            | Anthracite, hard coal, brown coal, coking coal, other bituminous coal, sub-bituminous coal, lignite, patent fuel, coke oven coke, gas coke, coal tar, BKB, peat, peat products, oil shale                                                                                                                                                                                                      |
| Gas                             | Natural gas, blast furnace gas, gasworks gas, coke oven gas, other recovered gases, natural gas liquids, refinery gas, liquefied petroleum gases                                                                                                                                                                                                                                               |
| Oil                             | Crude oil, refinery feedstocks, additives/blending components, other hydrocarbons, ethane, motor gasoline excl. biofuels, aviation gasoline, gasoline type jet fuel, kerosene type jet fuel, other kerosene, gas/diesel oil excl. biofuels, fuel oil, naphtha, white spirit & industrial spirit, lubricants, bitumen, paraffin waxes, petroleum coke, other oil products, crude/NGL/feedstocks |
| Solar                           | Solar PV, solar thermal                                                                                                                                                                                                                                                                                                                                                                        |
| Wind                            | Wind                                                                                                                                                                                                                                                                                                                                                                                           |
| Hydro                           | Hydro                                                                                                                                                                                                                                                                                                                                                                                          |
| Biomass                         | Primary solid biofuel, biogases, biogasoline, biodiesels, other liquid biofuels, non-specified primary biofuels and waste, renewable municipal waste                                                                                                                                                                                                                                           |
| Geothermal                      | Geothermal                                                                                                                                                                                                                                                                                                                                                                                     |
| Nuclear                         | Nuclear                                                                                                                                                                                                                                                                                                                                                                                        |

**Supplementary Table 4 | Sector mapping scheme used to aggregate the detailed electricity flow categories of energy balance tables.**

| <b>Sector in this study</b> | <b>Flow in WEB</b>                                                                                                              |
|-----------------------------|---------------------------------------------------------------------------------------------------------------------------------|
| Industry                    | Total final consumption in industry                                                                                             |
| Buildings                   | Residential, commercial and public services                                                                                     |
| Transportation              | Total final consumption in transportation                                                                                       |
| Other                       | Heat pumps, electric boilers, energy industry own use, agriculture/forestry, fishing, final consumption not elsewhere specified |

**Supplementary Table 5 | Regional trajectories of nuclear generation presented by key years\*.**

| <b>Region</b>    | <b>Unit</b> | <b>2024</b> | <b>2025</b> | <b>2030</b> | <b>2035</b> | <b>2040</b> | <b>2045</b> | <b>2050</b> |
|------------------|-------------|-------------|-------------|-------------|-------------|-------------|-------------|-------------|
| Asia             |             | 694038.1    | 724979.1    | 985571.0    | 1339862.6   | 1609477.8   | 1962361.4   | 2416299.0   |
| Latin America    |             | 33788.1     | 34556.7     | 38997.9     | 42814.2     | 39697.9     | 39578.1     | 40361.1     |
| Mideast+Africa   | GWh         | 45943.9     | 49595.4     | 65180.7     | 76133.5     | 89975.8     | 98120.9     | 113621.5    |
| OECD+EU          |             | 1601203.2   | 1613612.7   | 1649038.0   | 1644388.7   | 1522229.8   | 1390482.6   | 1445752.1   |
| E. Europe+Russia |             | 261202.7    | 261829.3    | 282760.4    | 310591.7    | 373108.6    | 374286.0    | 370243.3    |

\* Note: All values are derived from the median technology-specific generation projections of the 1.5°C and 2°C scenario assembles in the AR6 Scenarios Database.

**Supplementary Table 6 | Regional penetration rates of different renewable generation technologies presented by key years\*.**

| <b>Region</b>    | <b>Technology</b> | <b>2024</b> | <b>2025</b> | <b>2030</b> | <b>2035</b> | <b>2040</b> | <b>2045</b> | <b>2050</b> |
|------------------|-------------------|-------------|-------------|-------------|-------------|-------------|-------------|-------------|
| Asia             | Wind              | 26.0%       | 26.9%       | 32.6%       | 37.6%       | 39.9%       | 41.1%       | 42.4%       |
|                  | Solar             | 24.2%       | 25.6%       | 32.3%       | 37.7%       | 40.4%       | 42.2%       | 42.6%       |
|                  | Hydro             | 41.9%       | 39.9%       | 29.0%       | 20.4%       | 16.2%       | 13.5%       | 11.7%       |
|                  | Geothermal        | 0.6%        | 0.6%        | 0.7%        | 0.5%        | 0.4%        | 0.3%        | 0.3%        |
|                  | Biomass           | 7.3%        | 6.9%        | 5.5%        | 3.8%        | 3.1%        | 2.8%        | 3.0%        |
| E. Europe+Russia | Wind              | 3.2%        | 3.6%        | 8.9%        | 15.3%       | 18.3%       | 20.4%       | 24.2%       |
|                  | Solar             | 4.1%        | 4.6%        | 9.1%        | 15.8%       | 20.3%       | 25.6%       | 27.4%       |
|                  | Hydro             | 92.1%       | 91.2%       | 81.0%       | 67.6%       | 60.0%       | 52.8%       | 47.3%       |
|                  | Geothermal        | 0.1%        | 0.2%        | 0.3%        | 0.7%        | 1.0%        | 0.7%        | 0.6%        |
|                  | Biomass           | 0.4%        | 0.5%        | 0.6%        | 0.5%        | 0.4%        | 0.4%        | 0.5%        |
| Latin America    | Wind              | 14.8%       | 15.6%       | 19.6%       | 21.7%       | 22.5%       | 22.6%       | 23.2%       |
|                  | Solar             | 11.5%       | 12.4%       | 21.3%       | 34.2%       | 42.6%       | 48.6%       | 51.0%       |
|                  | Hydro             | 66.2%       | 64.4%       | 52.4%       | 39.2%       | 31.0%       | 25.1%       | 22.1%       |
|                  | Geothermal        | 0.4%        | 0.4%        | 0.4%        | 0.3%        | 0.2%        | 0.2%        | 0.1%        |
|                  | Biomass           | 7.2%        | 7.1%        | 6.2%        | 4.6%        | 3.7%        | 3.5%        | 3.6%        |
| Mideast+Africa   | Wind              | 12.6%       | 13.2%       | 19.1%       | 24.2%       | 27.6%       | 26.8%       | 27.1%       |
|                  | Solar             | 22.5%       | 23.9%       | 36.8%       | 46.2%       | 52.2%       | 58.4%       | 61.4%       |
|                  | Hydro             | 61.9%       | 59.7%       | 39.7%       | 26.3%       | 17.6%       | 12.7%       | 9.7%        |
|                  | Geothermal        | 1.9%        | 1.9%        | 3.1%        | 2.4%        | 1.7%        | 1.2%        | 0.9%        |
|                  | Biomass           | 1.2%        | 1.2%        | 1.3%        | 0.9%        | 0.9%        | 0.9%        | 0.8%        |
| OECD+EU          | Wind              | 31.7%       | 32.5%       | 32.9%       | 34.6%       | 34.7%       | 35.3%       | 35.8%       |
|                  | Solar             | 21.1%       | 22.0%       | 30.6%       | 36.5%       | 42.6%       | 45.0%       | 47.2%       |

|            |       |       |       |       |       |       |       |
|------------|-------|-------|-------|-------|-------|-------|-------|
| Hydro      | 37.5% | 36.1% | 28.1% | 21.5% | 16.6% | 14.0% | 11.9% |
| Geothermal | 1.5%  | 1.5%  | 1.4%  | 1.1%  | 1.0%  | 0.9%  | 0.7%  |
| Biomass    | 8.3%  | 8.0%  | 7.1%  | 6.3%  | 5.1%  | 4.9%  | 4.4%  |

\*Note: All values are derived from the median technology-specific generation projections of the 1.5°C and 2°C scenario assembles in the AR6 Scenarios Database.

**Supplementary Table 7 | Regional penetration rates of different fossil generation technologies presented by key years\*.**

| <b>Region</b>    | <b>Technology</b> | <b>2024</b> | <b>2025</b> | <b>2030</b> | <b>2035</b> | <b>2040</b> | <b>2045</b> | <b>2050</b> |
|------------------|-------------------|-------------|-------------|-------------|-------------|-------------|-------------|-------------|
| Asia             | Coal              | 85.3%       | 84.3%       | 76.5%       | 45.9%       | 17.1%       | 11.1%       | 6.7%        |
|                  | Oil               | 1.0%        | 0.9%        | 0.5%        | 0.3%        | 0.3%        | 0.2%        | 0.0%        |
|                  | Gas               | 13.7%       | 14.8%       | 23.0%       | 53.8%       | 82.6%       | 88.7%       | 93.3%       |
| E. Europe+Russia | Coal              | 29.5%       | 28.6%       | 19.1%       | 2.9%        | 4.0%        | 2.2%        | 0.6%        |
|                  | Oil               | 1.2%        | 1.2%        | 0.7%        | 0.6%        | 0.0%        | 0.0%        | 0.0%        |
|                  | Gas               | 69.3%       | 70.2%       | 80.2%       | 96.5%       | 96.0%       | 97.8%       | 99.4%       |
| Latin America    | Coal              | 12.4%       | 10.9%       | 6.9%        | 0.3%        | 0.2%        | 0.2%        | 0.2%        |
|                  | Oil               | 16.4%       | 15.3%       | 7.3%        | 6.2%        | 4.5%        | 3.9%        | 2.5%        |
|                  | Gas               | 71.2%       | 73.8%       | 85.7%       | 93.4%       | 95.3%       | 96.0%       | 97.3%       |
| Mideast+Africa   | Coal              | 11.7%       | 11.6%       | 8.4%        | 2.8%        | 0.7%        | 1.2%        | 0.9%        |
|                  | Oil               | 20.3%       | 14.7%       | 8.6%        | 7.5%        | 6.3%        | 5.1%        | 3.0%        |
|                  | Gas               | 68.0%       | 73.6%       | 82.9%       | 89.7%       | 93.0%       | 93.7%       | 96.1%       |
| OECD+EU          | Coal              | 32.9%       | 29.9%       | 18.7%       | 10.9%       | 8.5%        | 4.1%        | 2.2%        |
|                  | Oil               | 2.0%        | 1.9%        | 0.7%        | 0.3%        | 0.2%        | 0.2%        | 0.1%        |
|                  | Gas               | 65.1%       | 68.2%       | 80.6%       | 88.8%       | 91.3%       | 95.7%       | 97.7%       |

\*Note: All values are derived from the median technology-specific generation projections of the 1.5°C and 2°C scenario assembles in the AR6 Scenarios Database.

**Supplementary Table 8 | Hydrogen production technology mapping and energy intensity.**

| <b>Technology in WEO</b> | <b>Technology in IEA</b> | <b>Technology in AR6</b>                | <b>Electricity demand (TWh/Mt)</b> |
|--------------------------|--------------------------|-----------------------------------------|------------------------------------|
| Water electrolysis       | Electrolysis             | Secondary Energy Hydrogen Electricity   | 50.0                               |
| Fossil fuels with CCUS   | SMR w CCS 93%            | Secondary Energy Hydrogen Fossil w/ CCS | 0.8                                |

## Supplementary References

1. IEA. *World Energy Outlook 2025*. <https://iea.blob.core.windows.net/assets/dfe5daf4-dbc1-4533-abe8-faf1face0f9/WorldEnergyOutlook2025.pdf> (2025).
2. IEA. *Global Hydrogen Review 2025*. <https://www.iea.org/reports/global-hydrogen-review-2025> (2025).
